# Supplementary material for: Description of Aeminiaceae fam. nov., Aeminium gen. nov. and Aeminiumludgeri sp. nov. (Capnodiales), isolated from a biodeteriorated art-piece in the Old Cathedral of Coimbra, Portugal
Source: PubMed Central journal article supplement (PMC6361875; doi:10.3897/mycokeys.45.31799), 2019-01-28

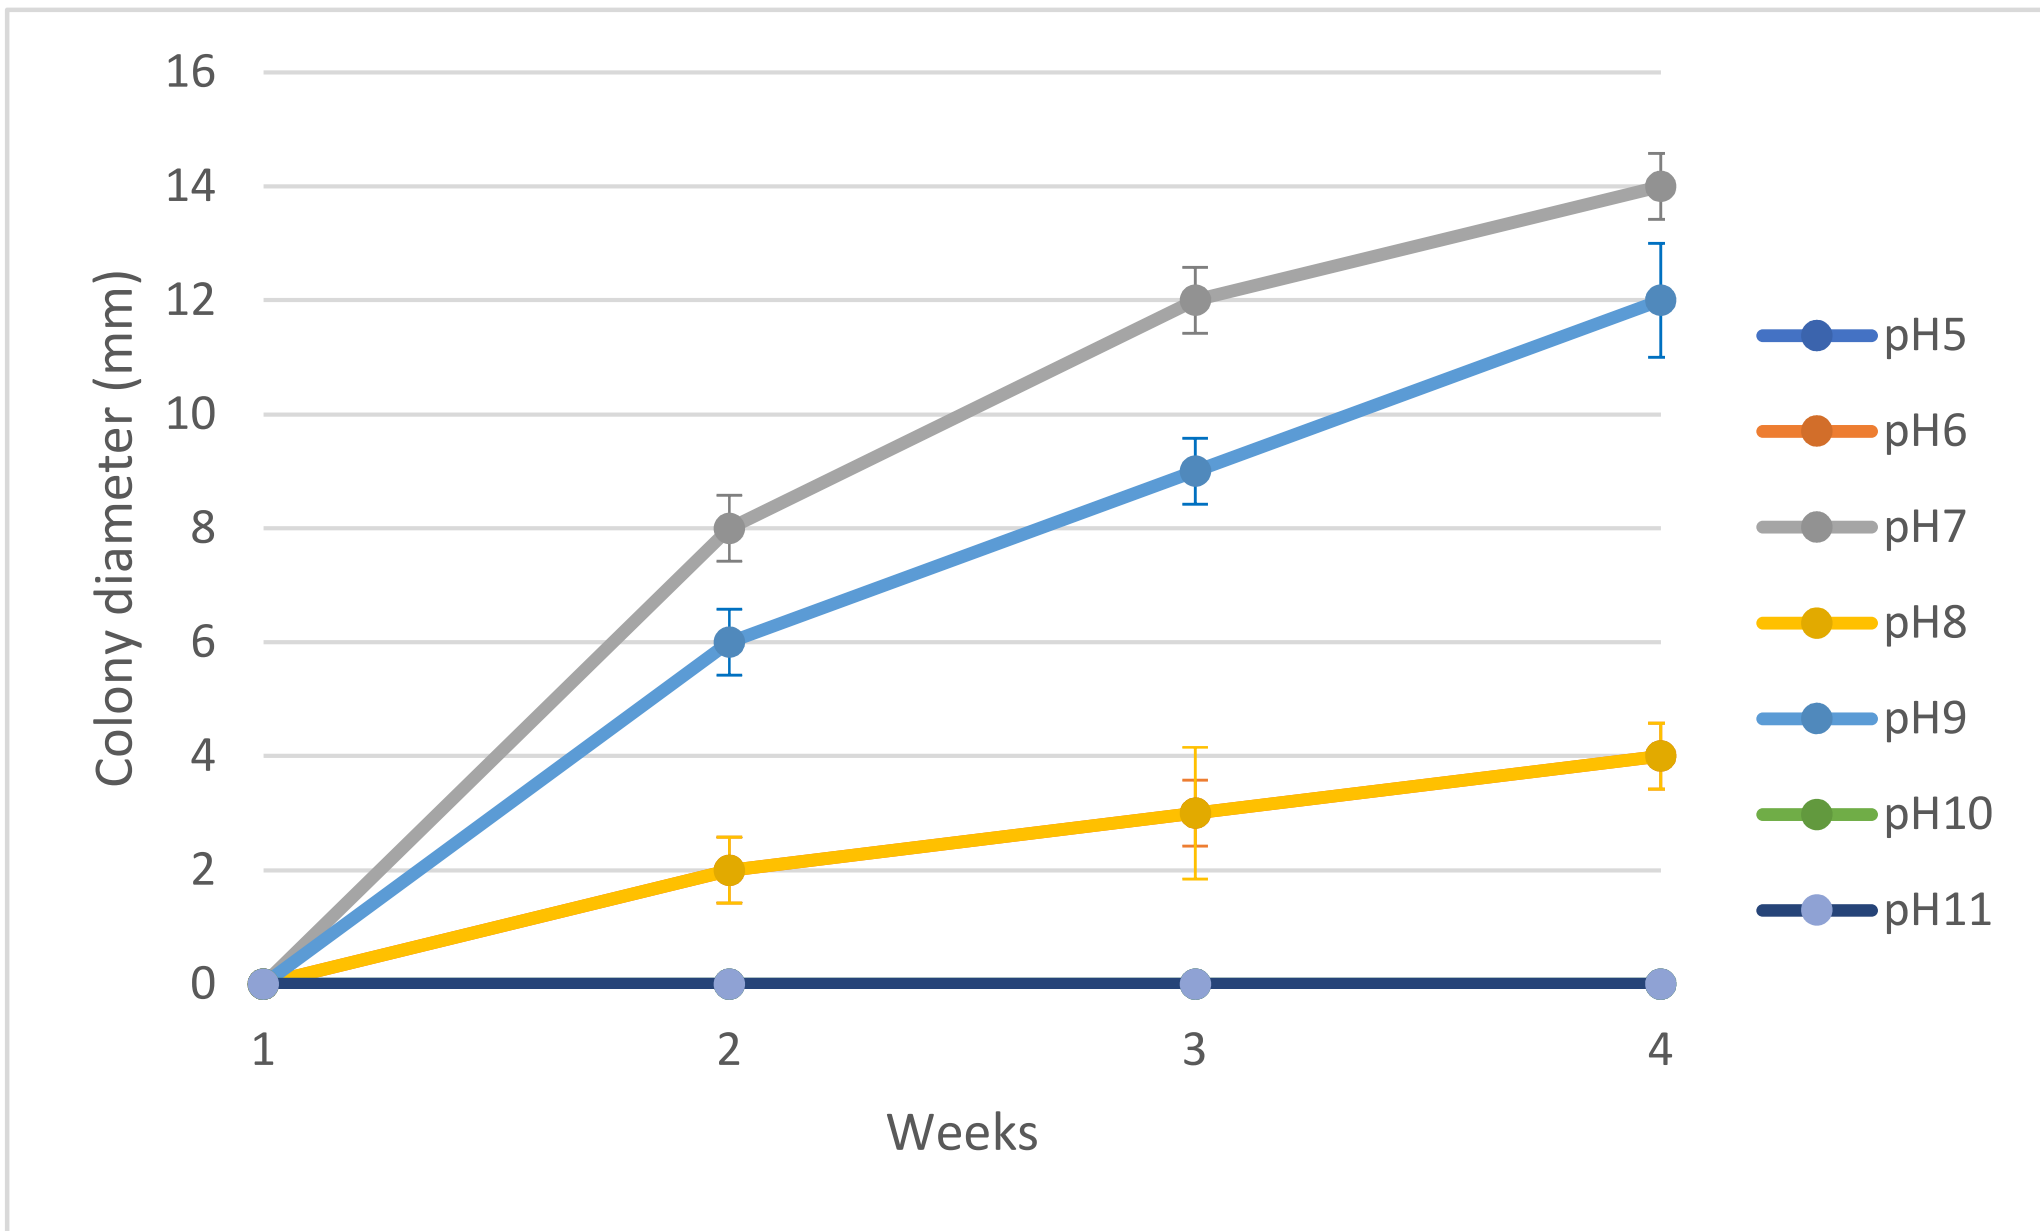

Supplement: mycokeys-45-057-s005.pdf [file mycokeys-45-057-s005.pdf]
